# Supplementary material for: A new visible-light driving nanocomposite photocatalyst Er3+:Y3Al5O12/MoS2–NaTaO3–PdS for photocatalytic degradation of a refractory pollutant with potentially simultaneous hydrogen evolution
Source: Royal Society of Chemistry journal article supplement (doi:10.1039/c6ra15320h), 2016-01-01
Supplement: c6ra15320h1.pdf [file c6ra15320h1.pdf]

## Content of Electronic Supporting Materials:

### S2.2.1. Synthesis of $\text{Er}^{3+}:\text{Y}_3\text{Al}_5\text{O}_{12}$ as up-conversion luminescence agent

**Fig. S1.** XRD patterns of (a)  $\text{Er}^{3+}:\text{Y}_3\text{Al}_5\text{O}_{12}$  (heated-treated at 1100 °C for 120 min), (b) pure  $\text{NaTaO}_3$ , (c-g)  $\text{Er}^{3+}:\text{Y}_3\text{Al}_5\text{O}_{12}/\text{MoS}_2\text{-NaTaO}_3\text{-PdS}$  nanocomposite photocatalyst (with 0.20 wt%  $\text{MoS}_2$  and 0.13 wt% PdS contents and different molar ratios ((c) 0.00:1.00, (d) 0.05:1.00, (e) 0.25:1.00, (f) 0.45:1.00 and (g) 0.65:1.00) of  $\text{Er}^{3+}:\text{Y}_3\text{Al}_5\text{O}_{12}$  and  $\text{NaTaO}_3$ ).

**Fig. S2.** EDX spectra of (a)  $\text{Er}^{3+}:\text{Y}_3\text{Al}_5\text{O}_{12}$  powder (heat-treated at 1100 °C for 120 min), (b) pure  $\text{NaTaO}_3$  and (c)  $\text{Er}^{3+}:\text{Y}_3\text{Al}_5\text{O}_{12}/\text{MoS}_2\text{-NaTaO}_3\text{-PdS}$  nanocomposite photocatalyst (with 0.13 wt% PdS and 0.20 wt%  $\text{MoS}_2$  contents and 0.45:1.00 molar ratio of  $\text{Er}^{3+}:\text{Y}_3\text{Al}_5\text{O}_{12}$  and  $\text{NaTaO}_3$ ).

**Fig. S3.** XPS spectra of  $\text{Er}^{3+}:\text{Y}_3\text{Al}_5\text{O}_{12}/\text{MoS}_2\text{-NaTaO}_3\text{-PdS}$  nanocomposite photocatalyst (with 0.13 wt% PdS and 0.20 wt%  $\text{MoS}_2$  contents and 0.45:1.00 molar ratio of  $\text{Er}^{3+}:\text{Y}_3\text{Al}_5\text{O}_{12}$  and  $\text{NaTaO}_3$ ).

## Electronic Supporting Materials:

### S2.2.1. Synthesis of $\text{Er}^{3+}:\text{Y}_3\text{Al}_5\text{O}_{12}$ as up-conversion luminescence agent

The  $\text{Er}^{3+}:\text{Y}_3\text{Al}_5\text{O}_{12}$  was synthesized by the sol-gel method. First, erbium oxide (10 mmol, 2.2715 g) and yttrium oxide (0.334 mmol, 0.0128 g) were dissolved in hot  $\text{HNO}_3$  solution (about 60 °C) with magnetic stirring and heated until transparent. Next appropriate amount of aluminum nitrate solution (33.6 mmol, 12.6208 g) and citric acid (168 mmol, 33.9351 g) as chelating agent were added into the mentioned mixture solution (molar ratio of citric acid: metal ion is 3:1), respectively. The solution was continued to be stirred and heated at 50-60 °C until the transparent sol was successfully formed. Then, the transparent sol was heated at 80 °C for 24 h and became the gel, which was ground into good homogeneous powders. For removing residual organic components and nitrate ions the powders were heated at 500 °C for 50 min, and then continued to heat to 1100 °C and kept for 2.0 h and finally permitted to cool down to the room temperature in atmosphere. After fully grinding, the nano-sized  $\text{Er}^{3+}:\text{Y}_3\text{Al}_5\text{O}_{12}$  powders were obtained.

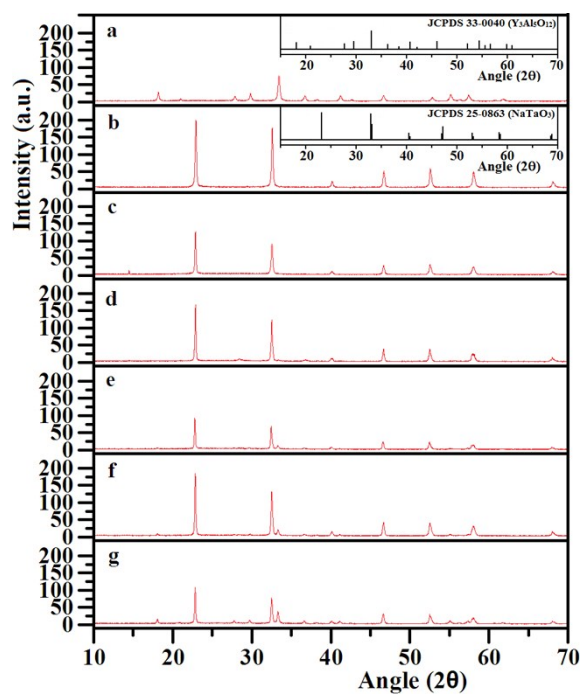

**Fig. S1.** XRD patterns of (a)  $\text{Er}^{3+}:\text{Y}_3\text{Al}_5\text{O}_{12}$  (heated-treated at 1100 °C for 120 min), (b) pure  $\text{NaTaO}_3$ , (c-g)  $\text{Er}^{3+}:\text{Y}_3\text{Al}_5\text{O}_{12}/\text{MoS}_2\text{-NaTaO}_3\text{-PdS}$  nanocomposite photocatalyst (with 0.20 wt%  $\text{MoS}_2$  and 0.13 wt% PdS contents and different molar ratios ((c) 0.00:1.00, (d) 0.05:1.00, (e) 0.25:1.00, (f) 0.45:1.00 and (g) 0.65:1.00) of  $\text{Er}^{3+}:\text{Y}_3\text{Al}_5\text{O}_{12}$  and  $\text{NaTaO}_3$ ).

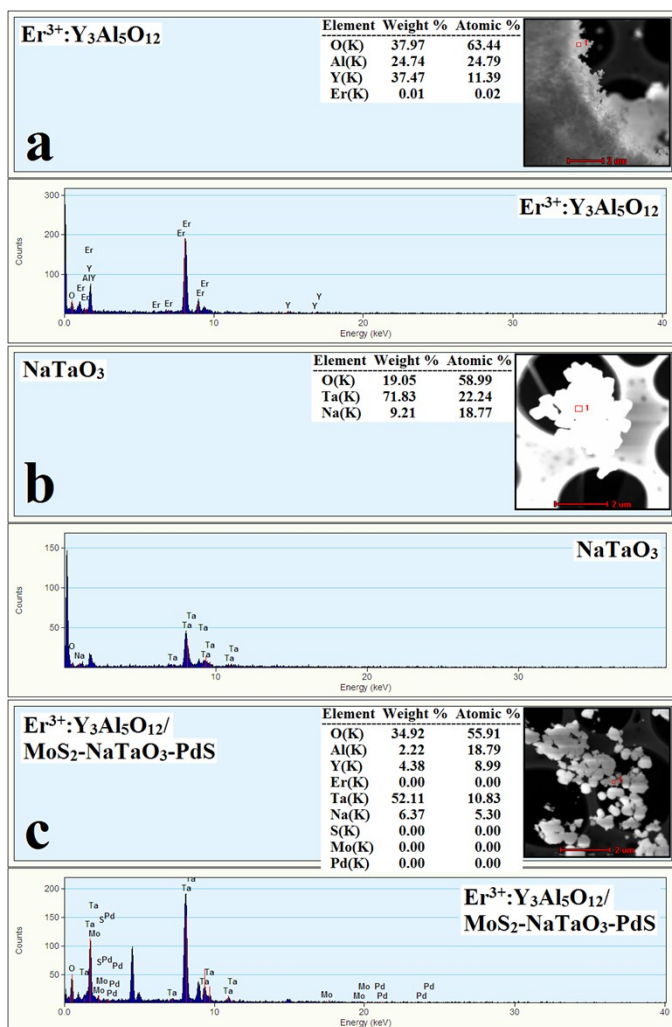

**Fig. S2.** EDX spectra of (a) Er<sup>3+</sup>:Y<sub>3</sub>Al<sub>5</sub>O<sub>12</sub> powder (heat-treated at 1100 °C for 120 min), (b) pure NaTaO<sub>3</sub> and (c) Er<sup>3+</sup>:Y<sub>3</sub>Al<sub>5</sub>O<sub>12</sub>/MoS<sub>2</sub>-NaTaO<sub>3</sub>-PdS nanocomposite photocatalyst (with 0.13 wt% PdS and 0.20 wt% MoS<sub>2</sub> contents and 0.45:1.00 molar ratio of Er<sup>3+</sup>:Y<sub>3</sub>Al<sub>5</sub>O<sub>12</sub> and NaTaO<sub>3</sub>).

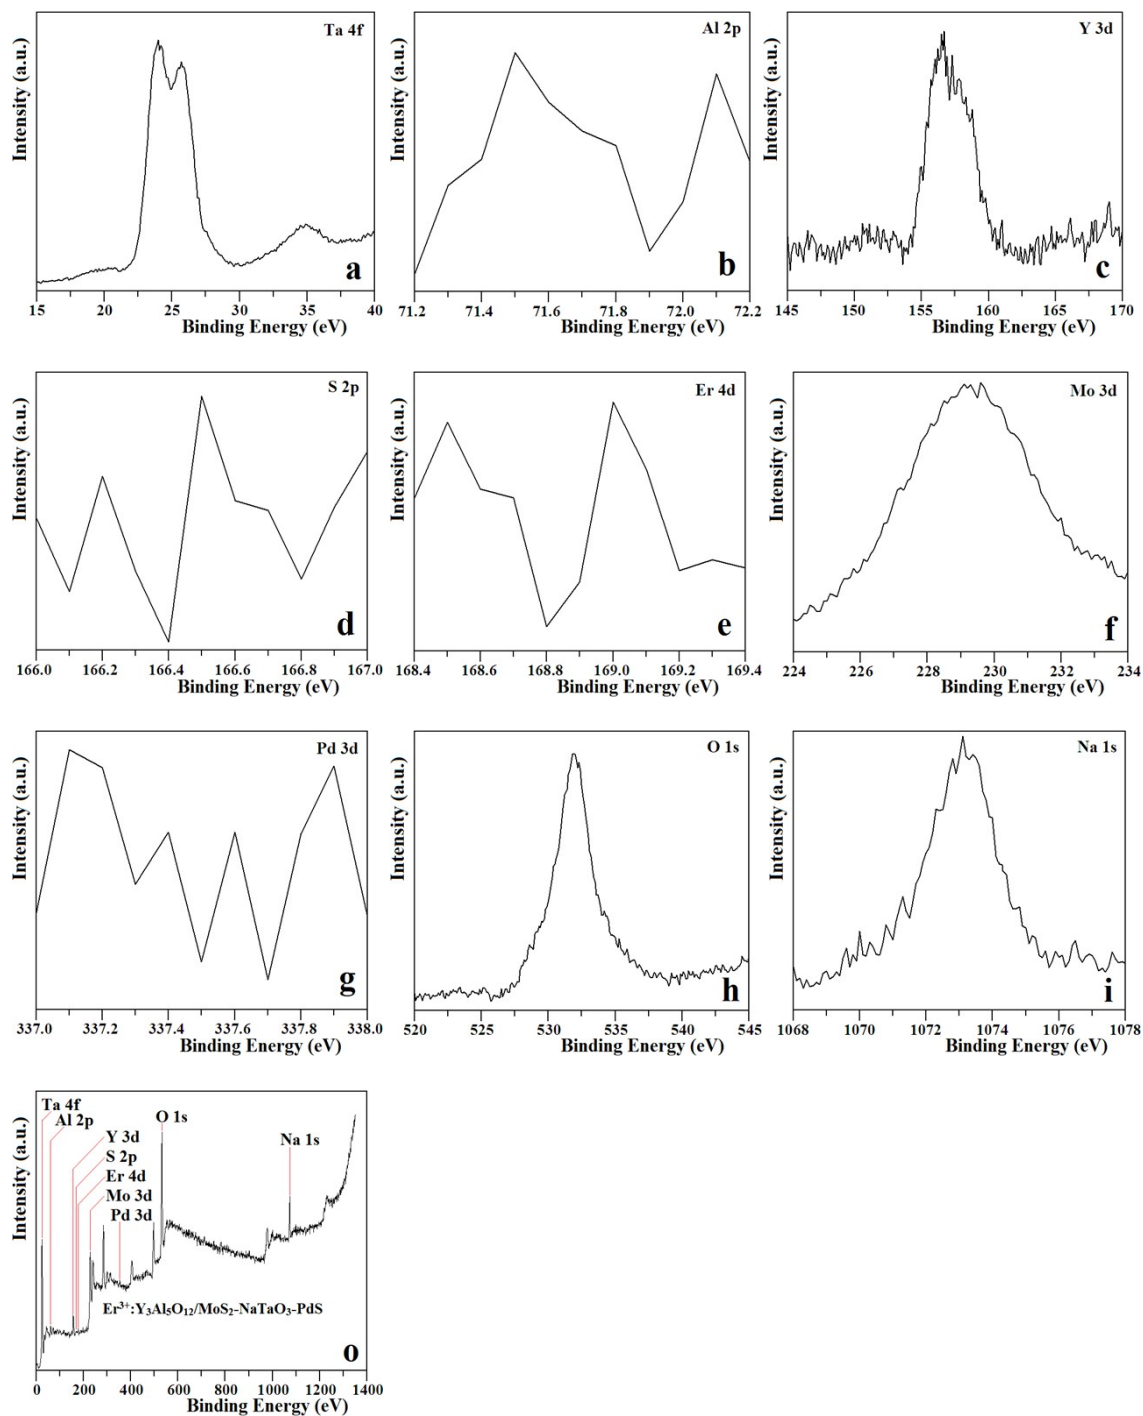

**Fig. S3.** XPS spectra of  $\text{Er}^{3+}:\text{Y}_3\text{Al}_5\text{O}_{12}/\text{MoS}_2\text{-NaTaO}_3\text{-PdS}$  nanocomposite photocatalyst (with 0.13 wt% PdS and 0.20 wt%  $\text{MoS}_2$  contents and 0.45:1.00 molar ratio of  $\text{Er}^{3+}:\text{Y}_3\text{Al}_5\text{O}_{12}$  and  $\text{NaTaO}_3$ ).
